# Supplementary material for: Circulating Interleukin-8 Dynamics Parallels Disease Course and Is Linked to Clinical Outcomes in Severe COVID-19
Source: MDPI journal article supplement (doi:10.3390/v15020549), 2023-02-16
Supplement: s1 [file s1]

# **Circulating interleukin-8 dynamics parallels disease course and is linked to clinical outcomes in severe COVID-19**

Ranit D'Rozario et al.

## **Supplemental information:**

Supplemental figure legends

Supplemental figure 1-4

Supplemental table 1-7

Supplemental codes 1-6

### Supplemental figure legends:

**Supplemental figure 1. Plasma Eotaxin and IFN $\gamma$  concentrations and clinical outcomes in severe COVID-19 patients.** **A)** Receiver operator characteristic curve (black line) of plasma levels of Eotaxin to derive remission versus non-remission (death), the marked point denotes the specificity and sensitivity with the derived cut-off. **B)** Receiver operator characteristic curve (black line) of plasma levels of IFN $\gamma$  to derive remission versus non-remission (death), the marked point denotes the specificity and sensitivity with the derived cut-off. **C)** Survival of patients till day 30 post-enrolment are compared in a Kaplan-Meier curve between patients with plasma level of Eotaxin below (Eotaxin<sub>lo</sub>, black line) or above (Eotaxin<sub>hi</sub>, red line) the cut-off derived from the ROC curve shown in (A). Surviving patients were censored on day 30 post-enrolment. **D)** Survival of patients till day 30 post-enrolment are compared in a Kaplan-Meier curve between patients with plasma level of IFN $\gamma$  below (IFN $\gamma$ <sub>lo</sub>, black line) or above (IFN $\gamma$ <sub>hi</sub>, red line) the cut-off derived from the ROC curve shown in (B). Surviving patients were censored on day 30 post-enrolment. **E)** Hospital stay duration (time to remission) of the patients from both groups, Eotaxin<sub>lo</sub> (black line) and Eotaxin<sub>hi</sub> (red line), since the day of enrolment are plotted in an ascending Kaplan-Meier curve. Deaths and non-remission at day 30 post-enrolment were censored. **F)** Hospital stay duration (time to remission) of the patients from both groups, IFN $\gamma$ <sub>lo</sub> (black line) and IFN $\gamma$ <sub>hi</sub> (red line), since the day of enrolment are plotted in an ascending Kaplan-Meier curve. Deaths and non-remission at day 30 post-enrolment were censored. For the outcome comparisons shown in (C) - (F) Mantel Cox log rank test was performed. Number of patients at risk on different days and the Mantel Haenszel Hazard Ratio is shown.

**Supplemental figure 2. Comparison of viral load and neutralizing antibody content of plasma among IL8<sub>lo</sub> and IL8<sub>hi</sub> patients.** **A)** Scatter plot showing CT values derived from RT-PCR for SARS-CoV-2 from nasopharyngeal swabs, comparing IL8<sub>lo</sub> and IL8<sub>hi</sub> patients. **B)** Scatter plot showing neutralizing antibody content of plasma derived from a surrogate virus neutralization assay, comparing IL8<sub>lo</sub> and IL8<sub>hi</sub> patients. In both cases two tailed Kolmogorov-Smirnov test was performed.

**Supplemental figure 3. Clinical outcome comparison between patient subgroups classified based on mean cut-off value for plasma IL-8 level over three time-points.** **A)** Survival of patients till day 30 post-enrolment are compared in a Kaplan-Meier curve between patients with plasma level of IL-8 below (IL8<sub>lo</sub>, black line) or above (IL8<sub>hi</sub>, red line) the mean cut-off value from three time-points. Surviving patients were censored on day 30 post-enrolment. **B)** Hospital stay duration (time to remission) of the patients from both groups, IL8<sub>lo</sub> (black line) and IL8<sub>hi</sub> (red line), since the day of enrolment are plotted in an ascending Kaplan-Meier curve. Deaths and non-remission at day 30 post-enrolment were censored. For the outcome comparisons shown Mantel Cox log rank test was

performed. Number of patients at risk on different days and the Mantel Haenszel Hazard Ratio is shown.

**Supplemental figure 4. Effect of age, gender and co-morbidities with circulating IL-8 in severe COVID-19 patients. A)** Correlation of plasma IL-8 level on the day of enrolment with age of the severe COVID-19 patients. **B)** Comparison of plasma IL-8 level on the day of enrolment among males and females. **C)** Comparison of plasma IL-8 level on the day of enrolment among severe COVID-19 patients with or without the major comorbidities, viz. type 2 diabetes mellitus (T2DM) and hypertension (HTN).

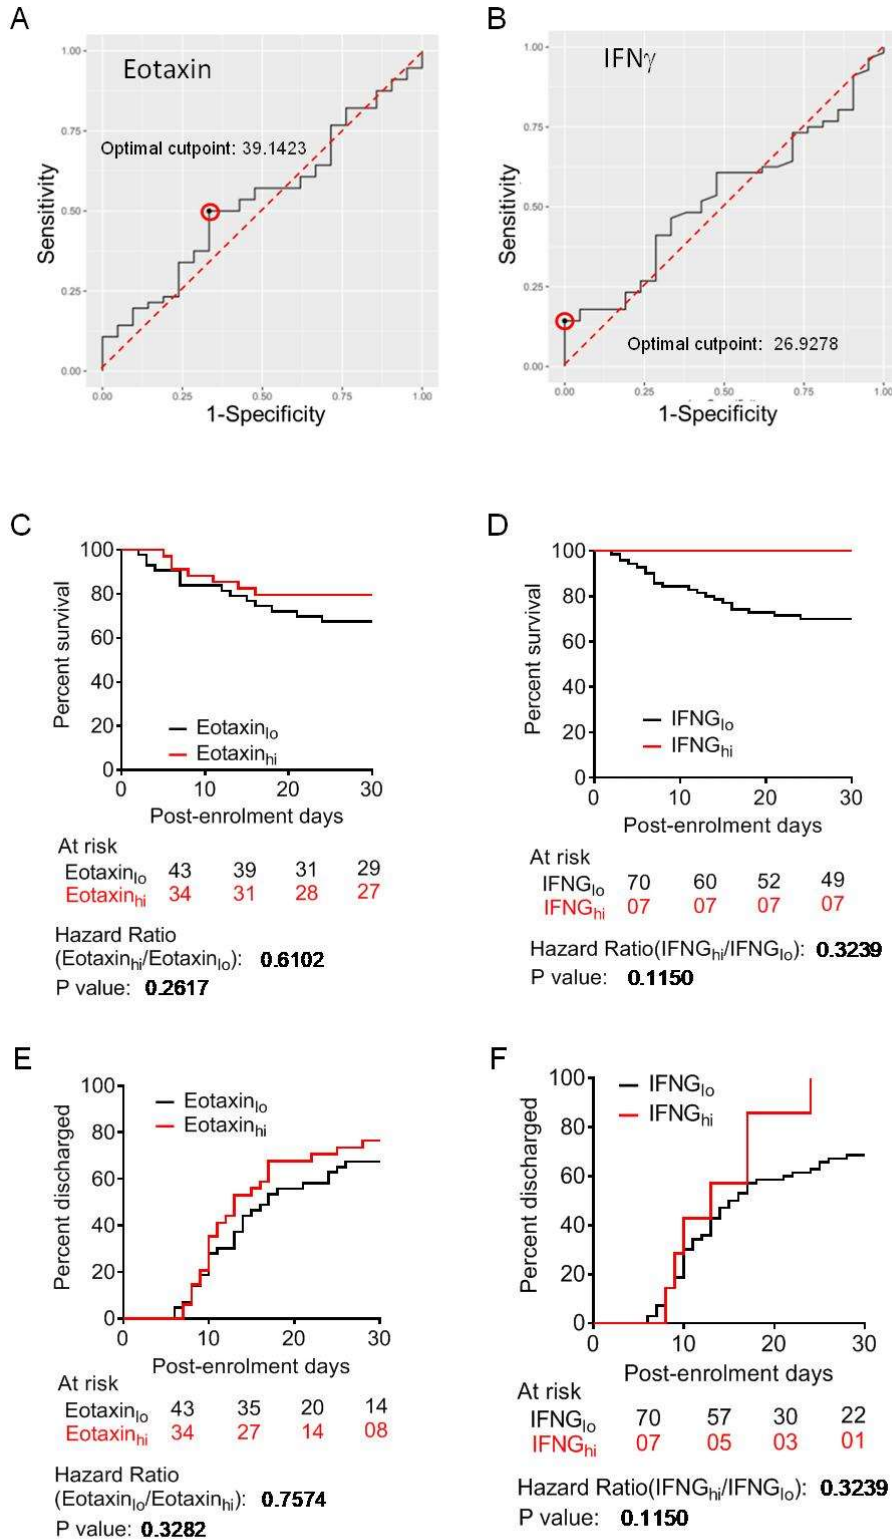

Supplemental figure 1

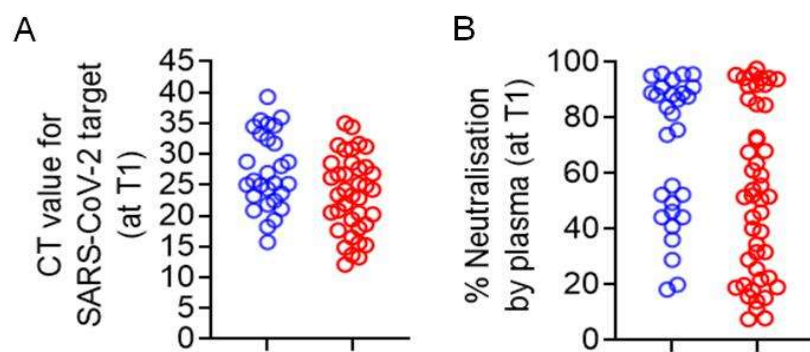

Supplemental figure 2

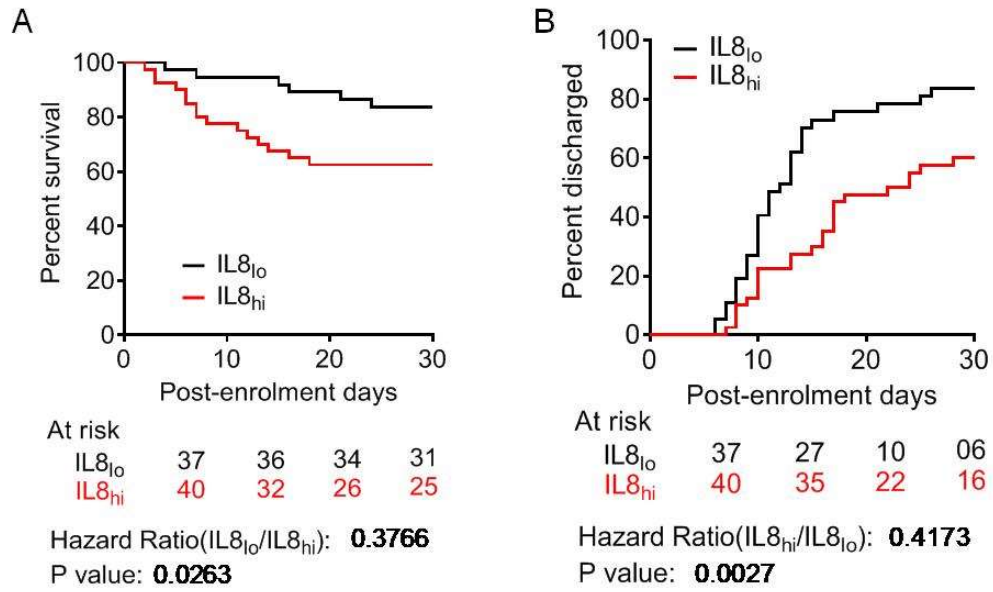

**Supplemental figure 3**

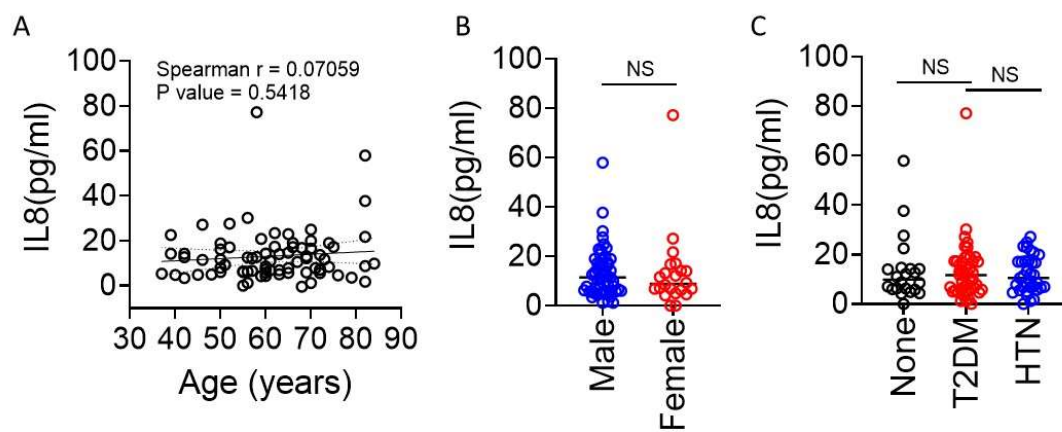

Supplemental figure 4

**Supplemental table 1. Cohort characteristics.**

|                             | <b>All ARDS</b>                    | <b>Low IL8</b>                      | <b>High IL8</b>                      |
|-----------------------------|------------------------------------|-------------------------------------|--------------------------------------|
| <b>Demography</b>           |                                    |                                     |                                      |
| Male                        | N=55, 71.43%,<br>Age=62±12.21years | N=20, 25.97%,<br>Age=60±12.59years  | N=35, 45.45%,<br>Age=62±12.03years   |
| Female                      | N=22, 28.57%,<br>Age=60±10.54years | N=10, 12.99%,<br>Age=60.5±8.43years | N=12, 15.58%,<br>Age=60.5±12.36years |
| <b>Major co-morbidities</b> |                                    |                                     |                                      |
| Type 2 diabetes             | N=46, 59.74%                       | N=18, 23.38%                        | N=28, 36.36%                         |
| Hypertension                | N=35, 45.45%                       | N=13, 16.88%                        | N=22, 28.57%                         |
| <b>Pharmacotherapy</b>      |                                    |                                     |                                      |
| Standard-of-care            | N=77, 100%                         | N=30, 100%                          | N=47, 100%                           |
| Remdesivir                  | N=25, 32.46%                       | N=10, 12.99%                        | N=15, 19.48%                         |
| Convalescent plasma         | N=38, 49.35%                       | N=14, 18.18%                        | N=24, 31.17%                         |



**Supplemental table 2. Enriched pathways for upregulated genes in IL8<sub>hi</sub> at time-point 1 as compared to IL8<sub>lo</sub> at the same time-point.**

| Cluster ID                  | List of pathway                                            | Total | Expected | Hits | P.Value | FDR   |
|-----------------------------|------------------------------------------------------------|-------|----------|------|---------|-------|
| ECM                         | Chondroitin sulfate biosynthesis                           | 23    | 1.14     | 5    | 0.00461 | 0.528 |
| Biosynthesis pathway        | Chondroitin sulfate/dermatan sulfate metabolism            | 53    | 2.62     | 6    | 0.0453  | 0.784 |
|                             | Keratan sulfate biosynthesis                               | 27    | 1.33     | 5    | 0.0094  | 0.528 |
|                             | Glycosaminoglycan metabolism                               | 118   | 5.83     | 12   | 0.0133  | 0.528 |
|                             | MPS VI - Maroteaux-Lamy syndrome                           | 118   | 5.83     | 12   | 0.0133  | 0.528 |
|                             | Mucopolysaccharidoses                                      | 118   | 5.83     | 12   | 0.0133  | 0.528 |
|                             | MPS IX - Natowicz syndrome                                 | 118   | 5.83     | 12   | 0.0133  | 0.528 |
|                             | MPS IIIB - Sanfilippo syndrome B                           | 118   | 5.83     | 12   | 0.0133  | 0.528 |
|                             | MPS I - Hurler syndrome                                    | 118   | 5.83     | 12   | 0.0133  | 0.528 |
|                             | MPS II - Hunter syndrome                                   | 118   | 5.83     | 12   | 0.0133  | 0.528 |
|                             | MPS VII - Sly syndrome                                     | 118   | 5.83     | 12   | 0.0133  | 0.528 |
|                             | MPS IV - Morquio syndrome A                                | 118   | 5.83     | 12   | 0.0133  | 0.528 |
|                             | MPS IIIC - Sanfilippo syndrome C                           | 118   | 5.83     | 12   | 0.0133  | 0.528 |
|                             | MPS IV - Morquio syndrome B                                | 118   | 5.83     | 12   | 0.0133  | 0.528 |
|                             | MPS IIIA - Sanfilippo syndrome A                           | 118   | 5.83     | 12   | 0.0133  | 0.528 |
|                             | MPS IIID - Sanfilippo syndrome D                           | 118   | 5.83     | 12   | 0.0133  | 0.528 |
|                             | Keratan sulfate/keratin metabolism                         | 32    | 1.58     | 5    | 0.0192  | 0.584 |
|                             | Galactose catabolism                                       | 5     | 0.247    | 2    | 0.022   | 0.585 |
|                             | Metabolism of carbohydrates                                | 258   | 12.8     | 21   | 0.0162  | 0.555 |
| Transcription of HIV genome | Transcription of the HIV genome                            | 64    | 3.16     | 8    | 0.0129  | 0.528 |
|                             | Tat-mediated elongation of the HIV-1 transcript            | 45    | 2.22     | 6    | 0.0223  | 0.585 |
|                             | Formation of HIV-1 elongation complex containing HIV-1 Tat | 45    | 2.22     | 6    | 0.0223  | 0.585 |
|                             | HIV-1 Transcription Elongation                             | 45    | 2.22     | 6    | 0.0223  | 0.585 |

|                            |                                                                            |      |      |    |         |       |
|----------------------------|----------------------------------------------------------------------------|------|------|----|---------|-------|
|                            | Formation of HIV-1 elongation complex in the absence of HIV-1 Tat          | 46   | 2.27 | 6  | 0.0246  | 0.585 |
|                            | Late Phase of HIV Life Cycle                                               | 108  | 5.34 | 10 | 0.0402  | 0.772 |
|                            | Formation of the HIV-1 Early Elongation Complex                            | 34   | 1.68 | 6  | 0.00579 | 0.528 |
|                            | HIV-1 Transcription Initiation                                             | 41   | 2.03 | 6  | 0.0145  | 0.528 |
|                            | RNA Polymerase II HIV-1 Promoter Escape                                    | 41   | 2.03 | 6  | 0.0145  | 0.528 |
|                            | Abortive elongation of HIV-1 transcript in the absence of Tat              | 23   | 1.14 | 4  | 0.0246  | 0.585 |
| Unfolded protein response  | Unfolded Protein Response                                                  | 66   | 3.26 | 10 | 0.00135 | 0.528 |
|                            | Activation of Chaperone Genes by XBP1(S)                                   | 46   | 2.27 | 6  | 0.0246  | 0.585 |
|                            | Activation of Chaperones by IRE1alpha                                      | 49   | 2.42 | 6  | 0.0325  | 0.662 |
| NOTCH signaling            | NOTCH1 Intracellular Domain Regulates Transcription                        | 50   | 2.47 | 6  | 0.0354  | 0.709 |
|                            | Signaling by NOTCH                                                         | 95   | 4.7  | 9  | 0.0443  | 0.777 |
| Cytokine signaling         | Cytokine Signaling in Immune system                                        | 286  | 14.1 | 22 | 0.0253  | 0.59  |
|                            | Immune System                                                              | 1140 | 56.2 | 68 | 0.0479  | 0.79  |
|                            | Interferon alpha/beta signaling                                            | 68   | 3.36 | 9  | 0.0059  | 0.528 |
|                            | Interferon Signaling                                                       | 173  | 8.55 | 15 | 0.0237  | 0.585 |
|                            | Antigen Presentation: Folding, assembly and peptide loading of class I MHC | 25   | 1.24 | 4  | 0.0326  | 0.662 |
| Toll like receptor cascade | TRIF-mediated TLR3/TLR4 signaling                                          | 87   | 4.3  | 9  | 0.0272  | 0.617 |
|                            | MyD88-independent cascade                                                  | 88   | 4.35 | 9  | 0.029   | 0.617 |
|                            | Toll Like Receptor 3 (TLR3) Cascade                                        | 88   | 4.35 | 9  | 0.029   | 0.617 |
|                            | Toll-Like Receptors Cascades                                               | 123  | 6.08 | 11 | 0.0402  | 0.772 |

|                            |                                                                           |     |       |    |          |       |
|----------------------------|---------------------------------------------------------------------------|-----|-------|----|----------|-------|
|                            | NF-kB activation through FADD/RIP-1 pathway mediated by caspase-8 and -10 | 12  | 0.593 | 3  | 0.0189   | 0.584 |
|                            | TRAF6 mediated NF-kB activation                                           | 16  | 0.791 | 3  | 0.0415   | 0.774 |
|                            | Activation of NIMA Kinases NEK9, NEK6, NEK7                               | 7   | 0.346 | 2  | 0.0434   | 0.774 |
|                            | RIG-I/MDA5 mediated induction of IFN-alpha/beta pathways                  | 67  | 3.31  | 7  | 0.0463   | 0.784 |
| Semaphorin interactions    | Semaphorin interactions                                                   | 72  | 3.56  | 12 | 0.000183 | 0.257 |
|                            | Sema4D induced cell migration and growth-cone collapse                    | 29  | 1.43  | 6  | 0.00252  | 0.528 |
|                            | Sema4D in semaphorinsignaling                                             | 34  | 1.68  | 6  | 0.00579  | 0.528 |
|                            | SEMA3A-Plexin repulsion signaling by inhibiting Integrin adhesion         | 14  | 0.692 | 3  | 0.029    | 0.617 |
| Transcriptional regulation | RNA Pol II CTD phosphorylation and interaction with CE                    | 28  | 1.38  | 4  | 0.047    | 0.784 |
|                            | RNA Pol II CTD phosphorylation and interaction with CE                    | 28  | 1.38  | 4  | 0.047    | 0.784 |
|                            | RNA Polymerase II Pre-transcription Events                                | 62  | 3.06  | 8  | 0.0107   | 0.528 |
|                            | RNA Polymerase II Transcription Elongation                                | 46  | 2.27  | 6  | 0.0246   | 0.585 |
|                            | Formation of RNA Pol II elongation complex                                | 46  | 2.27  | 6  | 0.0246   | 0.585 |
|                            | Formation of the Early Elongation Complex                                 | 34  | 1.68  | 6  | 0.00579  | 0.528 |
|                            | Transcription                                                             | 149 | 7.36  | 15 | 0.00659  | 0.528 |
|                            | RNA Polymerase II Promoter Escape                                         | 41  | 2.03  | 6  | 0.0145   | 0.528 |
|                            | RNA Polymerase II Transcription Pre-Initiation And Promoter Opening       | 41  | 2.03  | 6  | 0.0145   | 0.528 |

|  |                                                                   |     |      |    |        |       |
|--|-------------------------------------------------------------------|-----|------|----|--------|-------|
|  | RNA Polymerase II Transcription Initiation                        | 41  | 2.03 | 6  | 0.0145 | 0.528 |
|  | RNA Polymerase II Transcription Initiation And Promoter Clearance | 41  | 2.03 | 6  | 0.0145 | 0.528 |
|  | RNA Polymerase II Transcription                                   | 107 | 5.29 | 11 | 0.0162 | 0.555 |
|  | Regulation of Cholesterol Biosynthesis by SREBP (SREBF)           | 39  | 1.93 | 5  | 0.0415 | 0.774 |
|  | mRNA Processing                                                   | 140 | 6.92 | 12 | 0.0436 | 0.774 |

**Supplemental table 3. Enriched pathways for downregulated genes in IL8<sub>hi</sub> at time-point 1 as compared to IL8<sub>lo</sub> at the same time-point.**

| Cluster ID                  | List of pathway                                                   | Total | Expected | Hits | P.Value  | FDR     |
|-----------------------------|-------------------------------------------------------------------|-------|----------|------|----------|---------|
| Transcription of HIV genome | HIV Infection                                                     | 214   | 19.5     | 33   | 0.00169  | 0.157   |
|                             | HIV-1 Transcription Initiation                                    | 41    | 3.73     | 10   | 0.00303  | 0.157   |
|                             | RNA Polymerase II HIV-1 Promoter Escape                           | 41    | 3.73     | 10   | 0.00303  | 0.157   |
|                             | Late Phase of HIV Life Cycle                                      | 108   | 9.83     | 23   | 8.26E-05 | 0.0289  |
|                             | HIV Life Cycle                                                    | 128   | 11.7     | 24   | 0.000454 | 0.0844  |
|                             | Transcription of the HIV genome                                   | 64    | 5.83     | 15   | 0.000482 | 0.0844  |
|                             | Formation of HIV-1 elongation complex in the absence of HIV-1 Tat | 46    | 4.19     | 10   | 0.00728  | 0.213   |
|                             | Tat-mediated elongation of the HIV-1 transcript                   | 45    | 4.1      | 9    | 0.0183   | 0.297   |
|                             | Formation of HIV-1 elongation complex containing HIV-1 Tat        | 45    | 4.1      | 9    | 0.0183   | 0.297   |
|                             | HIV-1 Transcription Elongation                                    | 45    | 4.1      | 9    | 0.0183   | 0.297   |
|                             | HIV-1 elongation arrest and recovery                              | 33    | 3        | 7    | 0.0264   | 0.304   |
|                             | Pausing and recovery of HIV-1 elongation                          | 33    | 3        | 7    | 0.0264   | 0.304   |
|                             |                                                                   |       |          |      |          |         |
| Transcriptional regulation  | RNA Pol II CTD phosphorylation and interaction with CE            | 28    | 2.55     | 7    | 0.0109   | 0.259   |
|                             | RNA Pol II CTD phosphorylation and interaction with CE            | 28    | 2.55     | 7    | 0.0109   | 0.259   |
|                             | Transcription                                                     | 149   | 13.6     | 31   | 8.24E-06 | 0.00578 |
|                             | RNA Polymerase II Transcription                                   | 107   | 9.74     | 22   | 0.000201 | 0.0565  |

|  |                                                                       |    |      |    |         |       |
|--|-----------------------------------------------------------------------|----|------|----|---------|-------|
|  | RNA Polymerase II Pre-transcription Events                            | 62 | 5.65 | 14 | 0.00109 | 0.153 |
|  | RNA Polymerase I, RNA Polymerase III, and Mitochondrial Transcription | 59 | 5.37 | 13 | 0.00207 | 0.157 |
|  | RNA Polymerase I Promoter Escape                                      | 22 | 2    | 7  | 0.00253 | 0.157 |
|  | RNA Polymerase II Promoter Escape                                     | 41 | 3.73 | 10 | 0.00303 | 0.157 |
|  | RNA Polymerase II Transcription Pre-Initiation And Promoter Opening   | 41 | 3.73 | 10 | 0.00303 | 0.157 |
|  | RNA Polymerase II Transcription Initiation                            | 41 | 3.73 | 10 | 0.00303 | 0.157 |
|  | RNA Polymerase II Transcription Initiation And Promoter Clearance     | 41 | 3.73 | 10 | 0.00303 | 0.157 |
|  | RNA Polymerase I Transcription Initiation                             | 23 | 2.09 | 7  | 0.00336 | 0.161 |
|  | RNA Polymerase I Promoter Clearance                                   | 24 | 2.19 | 7  | 0.00438 | 0.184 |
|  | RNA Polymerase I Transcription                                        | 26 | 2.37 | 7  | 0.00709 | 0.213 |
|  | Dual incision reaction in TC-NER                                      | 31 | 2.82 | 7  | 0.019   | 0.297 |
|  | Formation of transcription-coupled NER (TC-NER) repair complex        | 31 | 2.82 | 7  | 0.019   | 0.297 |
|  | RNA Polymerase I Chain Elongation                                     | 21 | 1.91 | 7  | 0.00187 | 0.157 |
|  | RNA Polymerase I Transcription Termination                            | 23 | 2.09 | 7  | 0.00336 | 0.161 |
|  | RNA Polymerase II Transcription Elongation                            | 46 | 4.19 | 10 | 0.00728 | 0.213 |
|  | Formation of RNA Pol II elongation complex                            | 46 | 4.19 | 10 | 0.00728 | 0.213 |

|                         |                                                                              |     |      |    |         |       |
|-------------------------|------------------------------------------------------------------------------|-----|------|----|---------|-------|
|                         | Transcription-coupled NER (TC-NER)                                           | 47  | 4.28 | 10 | 0.00851 | 0.226 |
|                         | RNA Polymerase III Transcription                                             | 33  | 3    | 7  | 0.0264  | 0.304 |
|                         | RNA Polymerase III Transcription Initiation                                  | 33  | 3    | 7  | 0.0264  | 0.304 |
|                         | Elongation arrest and recovery                                               | 33  | 3    | 7  | 0.0264  | 0.304 |
| DNA repair              | DNA Repair                                                                   | 117 | 10.7 | 21 | 0.0018  | 0.157 |
|                         | Resolution of AP sites via the multiple-nucleotide patch replacement pathway | 17  | 1.55 | 5  | 0.0151  | 0.293 |
|                         | Removal of DNA patch containing abasic residue                               | 17  | 1.55 | 5  | 0.0151  | 0.293 |
|                         | Nucleotide Excision Repair                                                   | 53  | 4.83 | 10 | 0.0196  | 0.297 |
|                         | Resolution of Abasic Sites (AP sites)                                        | 19  | 1.73 | 5  | 0.0244  | 0.304 |
|                         | Base Excision Repair                                                         | 19  | 1.73 | 5  | 0.0244  | 0.304 |
| Host-virus interactions | Vpr-mediated nuclear import of PICs                                          | 32  | 2.91 | 8  | 0.00662 | 0.213 |
|                         | Interactions of Vpr with host cellular proteins                              | 35  | 3.19 | 8  | 0.0116  | 0.259 |
|                         | Regulation of Glucokinase by Glucokinase Regulatory Protein                  | 29  | 2.64 | 8  | 0.00345 | 0.161 |
|                         | Rev-mediated nuclear export of HIV-1 RNA                                     | 32  | 2.91 | 8  | 0.00662 | 0.213 |
|                         | Nuclear import of Rev protein                                                | 33  | 3    | 8  | 0.00806 | 0.226 |
|                         | Interactions of Rev with host cellular proteins                              | 35  | 3.19 | 8  | 0.0116  | 0.259 |
|                         | Antiviral mechanism by IFN-stimulated genes                                  | 69  | 6.28 | 12 | 0.0206  | 0.298 |
|                         | ISG15 antiviral mechanism                                                    | 69  | 6.28 | 12 | 0.0206  | 0.298 |
|                         | Glucose transport                                                            | 40  | 3.64 | 8  | 0.0254  | 0.304 |
| TCA Cycle               | The citric acid (TCA) cycle and respiratory electron transport               | 145 | 13.2 | 24 | 0.00274 | 0.157 |

|                                      |                                                                                                                     |     |       |    |          |        |
|--------------------------------------|---------------------------------------------------------------------------------------------------------------------|-----|-------|----|----------|--------|
|                                      | Respiratory electron transport, ATP synthesis by chemiosmotic coupling, and heat production by uncoupling proteins. | 101 | 9.2   | 18 | 0.00403  | 0.176  |
|                                      | Formation of ATP by chemiosmotic coupling                                                                           | 16  | 1.46  | 5  | 0.0115   | 0.259  |
|                                      | Regulation of pyruvate dehydrogenase (PDH) complex                                                                  | 13  | 1.18  | 4  | 0.025    | 0.304  |
| Toll like receptor signaling cascade | TRIF-mediated TLR3/TLR4 signaling                                                                                   | 87  | 7.92  | 14 | 0.0246   | 0.304  |
|                                      | TRAF6 Mediated Induction of proinflammatory cytokines                                                               | 62  | 5.65  | 11 | 0.0227   | 0.304  |
|                                      | TRAF6 mediated induction of NFkB and MAP kinases upon TLR7/8 or 9 activation                                        | 76  | 6.92  | 14 | 0.00788  | 0.225  |
|                                      | Toll Like Receptor 7/8 (TLR7/8) Cascade                                                                             | 77  | 7.01  | 14 | 0.00885  | 0.226  |
|                                      | MyD88 dependent cascade initiated on endosome                                                                       | 77  | 7.01  | 14 | 0.00885  | 0.226  |
|                                      | Activation of the AP-1 family of transcription factors                                                              | 10  | 0.911 | 4  | 0.00915  | 0.229  |
|                                      | Toll Like Receptor 9 (TLR9) Cascade                                                                                 | 79  | 7.19  | 14 | 0.0111   | 0.259  |
|                                      | Toll Like Receptor 10 (TLR10) Cascade                                                                               | 74  | 6.74  | 13 | 0.0151   | 0.293  |
|                                      | Toll Like Receptor 5 (TLR5) Cascade                                                                                 | 74  | 6.74  | 13 | 0.0151   | 0.293  |
|                                      | MyD88 cascade initiated on plasma membrane                                                                          | 74  | 6.74  | 13 | 0.0151   | 0.293  |
|                                      | MAPK targets/ Nuclear events mediated by MAP kinases                                                                | 30  | 2.73  | 7  | 0.016    | 0.294  |
|                                      | Interleukin-1 signaling                                                                                             | 45  | 4.1   | 9  | 0.0183   | 0.297  |
|                                      | eNOS activation                                                                                                     | 9   | 0.82  | 6  | 3.68E-05 | 0.0172 |
|                                      | Smooth Muscle Contraction                                                                                           | 25  | 2.28  | 7  | 0.00561  | 0.213  |



|                                   |                                                                                     |     |       |    |          |        |
|-----------------------------------|-------------------------------------------------------------------------------------|-----|-------|----|----------|--------|
| eNOS activation pathway           | Antigen Activates B Cell Receptor Leading to Generation of Second Messengers        | 32  | 2.91  | 7  | 0.0225   | 0.304  |
|                                   | Activation of CaMK IV                                                               | 4   | 0.364 | 3  | 0.0028   | 0.157  |
|                                   | CaMK IV-mediated phosphorylation of CREB                                            | 5   | 0.455 | 3  | 0.00653  | 0.213  |
|                                   | Metabolism of nitric oxide                                                          | 20  | 1.82  | 6  | 0.00709  | 0.213  |
|                                   | eNOS activation and regulation                                                      | 20  | 1.82  | 6  | 0.00709  | 0.213  |
|                                   | CREB phosphorylation through the activation of CaMKK                                | 6   | 0.546 | 3  | 0.0122   | 0.263  |
|                                   | Ionotropic activity of Kainate Receptors                                            | 12  | 1.09  | 4  | 0.0186   | 0.297  |
|                                   | Activation of Ca-permeable Kainate Receptor                                         | 12  | 1.09  | 4  | 0.0186   | 0.297  |
|                                   | Glycogen breakdown (glycogenolysis)                                                 | 18  | 1.64  | 5  | 0.0194   | 0.297  |
|                                   | PLC beta mediated events                                                            | 46  | 4.19  | 9  | 0.0209   | 0.3    |
|                                   | G-protein mediated events                                                           | 47  | 4.28  | 9  | 0.0239   | 0.304  |
|                                   | Ras activation upon Ca <sup>2+</sup> influx through NMDA receptor                   | 19  | 1.73  | 5  | 0.0244   | 0.304  |
|                                   | Tetrahydrobiopterin (BH <sub>4</sub> ) synthesis, recycling, salvage and regulation | 13  | 1.18  | 4  | 0.025    | 0.304  |
| Post transcriptional modification | Regulatory RNA pathways                                                             | 28  | 2.55  | 8  | 0.00271  | 0.157  |
|                                   | mRNA Processing                                                                     | 140 | 12.7  | 23 | 0.00367  | 0.166  |
|                                   | Processing of Capped Intron-Containing Pre-mRNA                                     | 119 | 10.8  | 19 | 0.0107   | 0.259  |
|                                   | mRNA Splicing                                                                       | 115 | 10.5  | 18 | 0.0155   | 0.293  |
|                                   | mRNA Splicing - Major Pathway                                                       | 115 | 10.5  | 18 | 0.0155   | 0.293  |
|                                   | Deadenylation of mRNA                                                               | 24  | 2.19  | 6  | 0.018    | 0.297  |
|                                   | Metabolism of RNA                                                                   | 339 | 30.9  | 50 | 0.000358 | 0.0836 |
|                                   | Cytosolic tRNA aminoacylation                                                       | 24  | 2.19  | 8  | 0.000888 | 0.138  |

|  |                                          |     |      |    |         |       |
|--|------------------------------------------|-----|------|----|---------|-------|
|  | MicroRNA (miRNA) Biogenesis              | 25  | 2.28 | 8  | 0.0012  | 0.153 |
|  | Metabolism of mRNA                       | 317 | 28.9 | 44 | 0.00276 | 0.157 |
|  | Small Interfering RNA (siRNA) Biogenesis | 9   | 0.82 | 4  | 0.00591 | 0.213 |
|  | mRNA Capping                             | 30  | 2.73 | 7  | 0.016   | 0.294 |
|  | snRNP Assembly                           | 24  | 2.19 | 6  | 0.018   | 0.297 |
|  | Metabolism of non-coding RNA             | 24  | 2.19 | 6  | 0.018   | 0.297 |

**Supplemental table 4. Enriched pathways for upregulated genes in IL8<sub>hi</sub> at time-point 2 as compared to IL8<sub>lo</sub> at the same time-point.**

| Cluster ID            | List of pathway                                        | Total | Expected | Hits | P.Value | FDR   |
|-----------------------|--------------------------------------------------------|-------|----------|------|---------|-------|
| TLR Signaling Cascade | Cytosolic sensors of pathogen-associated DNA           | 19    | 0.962    | 4    | 0.0137  | 0.833 |
|                       | RIP-mediated NFkB activation via DAI                   | 11    | 0.557    | 3    | 0.0157  | 0.894 |
|                       | DAI mediated induction of type I IFNs                  | 13    | 0.658    | 4    | 0.0032  | 0.642 |
|                       | Activated TLR4 signalling                              | 100   | 5.06     | 10   | 0.0293  | 1     |
|                       | MyD88-independent cascade                              | 88    | 4.45     | 10   | 0.013   | 0.833 |
|                       | Toll-Like Receptors Cascades                           | 123   | 6.23     | 11   | 0.0465  | 1     |
|                       | Toll Like Receptor 3 (TLR3) Cascade                    | 88    | 4.45     | 10   | 0.013   | 0.833 |
|                       | TRIF-mediated TLR3/TLR4 signaling                      | 87    | 4.4      | 10   | 0.012   | 0.833 |
|                       | Toll Like Receptor 4 (TLR4) Cascade                    | 103   | 5.21     | 10   | 0.035   | 1     |
|                       | TRAF6 Mediated Induction of proinflammatory cytokines  | 62    | 3.14     | 7    | 0.036   | 1     |
|                       | Activation of the AP-1 family of transcription factors | 10    | 0.506    | 3    | 0.0118  | 0.833 |
|                       | MAPK targets/ Nuclear events mediated by MAP kinases   | 30    | 1.52     | 5    | 0.0162  | 0.894 |
| Cytokine signaling    | Signaling by Interleukins                              | 116   | 5.87     | 13   | 0.00556 | 0.833 |
|                       | Interleukin-3, 5 and GM-CSF signaling                  | 51    | 2.58     | 8    | 0.00374 | 0.656 |
|                       | Interleukin-7 signaling                                | 12    | 0.607    | 4    | 0.00231 | 0.642 |
|                       | Cytokine Signaling in Immune system                    | 286   | 14.5     | 24   | 0.00978 | 0.833 |
|                       | Inhibition of adenylate cyclase pathway                | 13    | 0.658    | 3    | 0.0252  | 1     |

|                               |                                                                  |     |       |    |        |       |
|-------------------------------|------------------------------------------------------------------|-----|-------|----|--------|-------|
| Cell proliferation and growth | CREB phosphorylation through the activation of Adenylate Cyclase | 5   | 0.253 | 2  | 0.0231 | 1     |
|                               | PKA-mediated phosphorylation of CREB                             | 19  | 0.962 | 4  | 0.0137 | 0.833 |
|                               | PKA activation in glucagon signalling                            | 19  | 0.962 | 4  | 0.0137 | 0.833 |
|                               | Adenylate cyclase activating pathway                             | 10  | 0.506 | 3  | 0.0118 | 0.833 |
|                               | PLCG1 events in ERBB2 signaling                                  | 38  | 1.92  | 5  | 0.0411 | 1     |
|                               | PLC-gamma1 signalling                                            | 37  | 1.87  | 5  | 0.0371 | 1     |
|                               | PKA activation                                                   | 18  | 0.911 | 4  | 0.0112 | 0.833 |
|                               | Adenylate cyclase inhibitory pathway                             | 13  | 0.658 | 3  | 0.0252 | 1     |
|                               | EGFR interacts with phospholipase C-gamma                        | 37  | 1.87  | 5  | 0.0371 | 1     |
|                               | DAG and IP3 signaling                                            | 35  | 1.77  | 5  | 0.03   | 1     |
|                               | Downstream signal transduction                                   | 163 | 8.25  | 14 | 0.0362 | 1     |
|                               | PKA-mediated phosphorylation of key metabolic factors            | 6   | 0.304 | 2  | 0.0335 | 1     |
|                               | Phospholipase C-mediated cascade                                 | 57  | 2.89  | 7  | 0.024  | 1     |
|                               | Signaling by PDGF                                                | 189 | 9.57  | 16 | 0.0295 | 1     |

**Supplemental table 5. Enriched pathways for downregulated genes in IL8<sub>hi</sub> at time-point 2 as compared to IL8<sub>lo</sub> at the same time-point.**

| Cluster ID                              | List of pathway                                                                                                     | Total | Expected | Hits | P.Value | FDR   |
|-----------------------------------------|---------------------------------------------------------------------------------------------------------------------|-------|----------|------|---------|-------|
| Toll-Like Receptors cascades            | TRIF-mediated TLR3/TLR4 signaling                                                                                   | 87    | 5.45     | 11   | 0.0192  | 0.718 |
|                                         | MyD88-independent cascade                                                                                           | 88    | 5.51     | 11   | 0.0207  | 0.718 |
|                                         | Activated TLR4 signalling                                                                                           | 100   | 6.26     | 11   | 0.0472  | 1     |
|                                         | Toll-Like Receptors Cascades                                                                                        | 123   | 7.7      | 13   | 0.0433  | 1     |
|                                         | Toll Like Receptor 3 (TLR3) Cascade                                                                                 | 88    | 5.51     | 11   | 0.0207  | 0.718 |
|                                         | Toll Like Receptor 3 (TLR3) Cascade                                                                                 | 88    | 5.51     | 11   | 0.0207  | 0.718 |
| Lymphocyte Activation                   | Adaptive Immune System                                                                                              | 654   | 40.9     | 54   | 0.0191  | 0.718 |
|                                         | TCR signaling                                                                                                       | 65    | 4.07     | 8    | 0.0486  | 1     |
|                                         | PD-1 signaling                                                                                                      | 25    | 1.57     | 5    | 0.0176  | 0.718 |
|                                         | Immune System                                                                                                       | 1140  | 71.2     | 85   | 0.0396  | 1     |
| Citric acid cycle (TCA cycle)           | Citric acid cycle (TCA cycle)                                                                                       | 26    | 1.63     | 5    | 0.0207  | 0.718 |
|                                         | The citric acid (TCA) cycle and respiratory electron transport                                                      | 145   | 9.08     | 17   | 0.00881 | 0.686 |
|                                         | Respiratory electron transport, ATP synthesis by chemiosmotic coupling, and heat production by uncoupling proteins. | 101   | 6.32     | 12   | 0.0232  | 0.775 |
|                                         | Respiratory electron transport                                                                                      | 82    | 5.13     | 10   | 0.0311  | 0.949 |
| Post translational protein modification | Metabolism of proteins                                                                                              | 689   | 43.1     | 54   | 0.0457  | 1     |
|                                         | Post-translational protein modification                                                                             | 200   | 12.5     | 21   | 0.0132  | 0.718 |
|                                         | Synthesis of glycosylphosphatidylinositol (GPI)                                                                     | 17    | 1.06     | 5    | 0.0031  | 0.62  |
|                                         | N-glycan trimming in the ER and Calnexin/Calreticulin cycle                                                         | 13    | 0.814    | 3    | 0.0435  | 1     |

|                 |                                                                                                                       |    |       |    |          |       |
|-----------------|-----------------------------------------------------------------------------------------------------------------------|----|-------|----|----------|-------|
|                 | The activation of arylsulfatases                                                                                      | 13 | 0.814 | 3  | 0.0435   | 1     |
|                 | Post-translational modification: synthesis of GPI-anchored proteins                                                   | 26 | 1.63  | 5  | 0.0207   | 0.718 |
|                 | Asparagine N-linked glycosylation                                                                                     | 86 | 5.38  | 11 | 0.0177   | 0.718 |
|                 | Biosynthesis of the N-glycan precursor (dolichol lipid-linked oligosaccharide, LLO) and transfer to a nascent protein | 32 | 2     | 6  | 0.0131   | 0.718 |
| Protein folding | Chaperonin-mediated protein folding                                                                                   | 51 | 3.19  | 9  | 0.00392  | 0.654 |
|                 | Cooperation of Prefoldin and TriC/CCT in actin and tubulin folding                                                    | 30 | 1.88  | 6  | 0.00953  | 0.703 |
|                 | Association of TriC/CCT with target proteins during biosynthesis                                                      | 29 | 1.82  | 6  | 0.00804  | 0.663 |
|                 | Prefoldin mediated transfer of substrate to CCT/TriC                                                                  | 29 | 1.82  | 6  | 0.00804  | 0.663 |
|                 | Folding of actin by CCT/TriC                                                                                          | 9  | 0.563 | 3  | 0.0154   | 0.718 |
|                 | Protein folding                                                                                                       | 56 | 3.51  | 11 | 0.000581 | 0.261 |

**Supplemental table 6. Enriched pathways for upregulated genes at time-point 3 (T3) as compared to at time-point 1 (T1), in patients who were IL8<sub>hi</sub> at T1 and became IL8<sub>lo</sub> at T3.**

| Cluster ID              | List of pathway                                                                     | Total | Expected | Hits | P.Value | FDR    |
|-------------------------|-------------------------------------------------------------------------------------|-------|----------|------|---------|--------|
| Notch signaling pathway | A third proteolytic cleavage releases NICD                                          | 9     | 0.148    | 2    | 0.00898 | 0.21   |
|                         | Signaling by NOTCH1 PEST Domain Mutants in Cancer                                   | 74    | 1.22     | 5    | 0.00724 | 0.175  |
|                         | Signaling by NOTCH                                                                  | 95    | 1.57     | 6    | 0.00462 | 0.144  |
|                         | Constitutive Signaling by NOTCH1 HD+PEST Domain Mutants                             | 52    | 0.857    | 5    | 0.00155 | 0.0661 |
|                         | Signaling by NOTCH1                                                                 | 74    | 1.22     | 5    | 0.00724 | 0.175  |
|                         | Signaling by NOTCH1 in Cancer                                                       | 74    | 1.22     | 5    | 0.00724 | 0.175  |
|                         | Constitutive Signaling by NOTCH1 PEST Domain Mutants                                | 59    | 0.972    | 5    | 0.00273 | 0.0958 |
|                         | Cell death signalling via NRAGE, NRIF and NADE                                      | 62    | 1.02     | 4    | 0.0187  | 0.335  |
|                         | Receptor-ligand binding initiates the second proteolytic cleavage of Notch receptor | 14    | 0.231    | 2    | 0.0215  | 0.355  |
|                         | Signaling by NOTCH1 HD+PEST Domain Mutants in Cancer                                | 74    | 1.22     | 5    | 0.00724 | 0.175  |
|                         | Signaling by NOTCH1 t(7;9)(NOTCH1:M1580_K255 5) Translocation Mutant                | 74    | 1.22     | 5    | 0.00724 | 0.175  |
|                         | NRIF signals cell death from the nucleus                                            | 15    | 0.247    | 3    | 0.00171 | 0.0667 |
|                         | Pre-NOTCH Processing in the Endoplasmic Reticulum                                   | 6     | 0.0988   | 2    | 0.00386 | 0.129  |
|                         |                                                                                     |       |          |      |         |        |

|                     |                                                                  |     |       |    |             |           |
|---------------------|------------------------------------------------------------------|-----|-------|----|-------------|-----------|
|                     | NOTCH1 Intracellular Domain Regulates Transcription              | 50  | 0.824 | 4  | 0.00897     | 0.21      |
|                     | Signaling by NOTCH1 HD Domain Mutants in Cancer                  | 74  | 1.22  | 5  | 0.00724     | 0.175     |
|                     | FBXW7 Mutants and NOTCH1 in Cancer                               | 74  | 1.22  | 5  | 0.00724     | 0.175     |
|                     | Activated NOTCH1 Transmits Signal to the Nucleus                 | 29  | 0.478 | 3  | 0.0116      | 0.259     |
|                     | Constitutive Signaling by NOTCH1 HD Domain Mutants               | 14  | 0.231 | 2  | 0.0215      | 0.355     |
|                     | Signaling by NOTCH2                                              | 18  | 0.297 | 2  | 0.0347      | 0.454     |
|                     | NOTCH2 Activation and Transmission of Signal to the Nucleus      | 18  | 0.297 | 2  | 0.0347      | 0.454     |
| Translation of mRNA | Peptide chain elongation                                         | 178 | 2.93  | 15 | 0.000000175 | 0.0000473 |
|                     | 3' -UTR-mediated translational regulation                        | 201 | 3.31  | 15 | 0.000000848 | 0.0000958 |
|                     | Nonsense Mediated Decay Independent of the Exon Junction Complex | 184 | 3.03  | 15 | 0.00000027  | 0.0000508 |
|                     | Ribosomal scanning and start codon recognition                   | 91  | 1.5   | 7  | 0.000705    | 0.0412    |
|                     | Influenza Viral RNA Transcription and Replication                | 176 | 2.9   | 15 | 0.00000015  | 0.0000473 |
|                     | Influenza Infection                                              | 185 | 3.05  | 15 | 0.00000029  | 0.0000508 |
|                     | Influenza Life Cycle                                             | 180 | 2.97  | 15 | 0.000000202 | 0.0000473 |



|                                                                                                        |     |      |    |             |           |
|--------------------------------------------------------------------------------------------------------|-----|------|----|-------------|-----------|
| L13a-mediated translational silencing of Ceruloplasmin expression                                      | 201 | 3.31 | 15 | 0.000000848 | 0.0000958 |
| Metabolism of mRNA                                                                                     | 317 | 5.22 | 16 | 0.0000546   | 0.00403   |
| GTP hydrolysis and joining of the 60S ribosomal subunit                                                | 201 | 3.31 | 15 | 0.000000848 | 0.0000958 |
| Eukaryotic Translation Initiation                                                                      | 209 | 3.44 | 15 | 0.00000139  | 0.000115  |
| Eukaryotic Translation Termination                                                                     | 178 | 2.93 | 15 | 0.000000175 | 0.0000473 |
| Activation of the mRNA upon binding of the cap-binding complex and eIFs, and subsequent binding to 43S | 93  | 1.53 | 7  | 0.000804    | 0.0433    |
| Viral mRNA Translation                                                                                 | 176 | 2.9  | 15 | 0.00000015  | 0.0000473 |
| Metabolism of RNA                                                                                      | 339 | 5.58 | 16 | 0.000121    | 0.0085    |
| Nonsense-Mediated Decay                                                                                | 203 | 3.34 | 15 | 0.000000962 | 0.0000958 |
| Translation                                                                                            | 249 | 4.1  | 16 | 0.00000261  | 0.000203  |
| Translation initiation complex formation                                                               | 92  | 1.52 | 7  | 0.000753    | 0.0422    |
| Cap-dependent Translation Initiation                                                                   | 209 | 3.44 | 15 | 0.00000139  | 0.000115  |
| Eukaryotic Translation Elongation                                                                      | 186 | 3.06 | 16 | 4.87E-08    | 0.0000473 |
| Formation of the ternary complex, and subsequently, the 43S complex                                    | 83  | 1.37 | 7  | 0.000403    | 0.0257    |
| Formation of a pool of free 40S subunits                                                               | 189 | 3.11 | 15 | 0.000000383 | 0.0000597 |

|                             |                                                                   |     |       |    |             |           |
|-----------------------------|-------------------------------------------------------------------|-----|-------|----|-------------|-----------|
|                             | SRP-dependent cotranslational protein targeting to membrane       | 204 | 3.36  | 15 | 0.00000102  | 0.0000958 |
|                             | Nonsense Mediated Decay Enhanced by the Exon Junction Complex     | 203 | 3.34  | 15 | 0.000000962 | 0.0000958 |
| Transcription of HIV genome | Late Phase of HIV Life Cycle                                      | 108 | 1.78  | 5  | 0.0324      | 0.454     |
|                             | Formation of HIV-1 elongation complex containing HIV-1 Tat        | 45  | 0.741 | 3  | 0.0374      | 0.463     |
|                             | Tat-mediated elongation of the HIV-1 transcript                   | 45  | 0.741 | 3  | 0.0374      | 0.463     |
|                             | Elongation arrest and recovery                                    | 33  | 0.544 | 4  | 0.00197     | 0.071     |
|                             | Formation of HIV-1 elongation complex in the absence of HIV-1 Tat | 46  | 0.758 | 4  | 0.00669     | 0.175     |
|                             | HIV-1 elongation arrest and recovery                              | 33  | 0.544 | 4  | 0.00197     | 0.071     |
|                             | Transcription of the HIV genome                                   | 64  | 1.05  | 4  | 0.0208      | 0.355     |
|                             | HIV-1 Transcription Elongation                                    | 45  | 0.741 | 3  | 0.0374      | 0.463     |
|                             | Pausing and recovery of Tat-mediated HIV-1 elongation             | 32  | 0.527 | 3  | 0.0153      | 0.293     |
|                             | RNA Polymerase II Transcription Elongation                        | 46  | 0.758 | 4  | 0.00669     | 0.175     |
|                             | Pausing and recovery of HIV-1 elongation                          | 33  | 0.544 | 4  | 0.00197     | 0.071     |
|                             | RNA Polymerase II Pre-transcription Events                        | 62  | 1.02  | 4  | 0.0187      | 0.335     |
|                             | Formation of RNA Pol II elongation complex                        | 46  | 0.758 | 4  | 0.00669     | 0.175     |

|            |                                                                |     |       |   |         |        |
|------------|----------------------------------------------------------------|-----|-------|---|---------|--------|
|            | Tat-mediated HIV-1 elongation arrest and recovery              | 32  | 0.527 | 3 | 0.0153  | 0.293  |
|            | RNA Polymerase III Chain Elongation                            | 18  | 0.297 | 2 | 0.0347  | 0.454  |
|            | Dual incision reaction in TC-NER                               | 31  | 0.511 | 3 | 0.014   | 0.287  |
|            | Formation of transcription-coupled NER (TC-NER) repair complex | 31  | 0.511 | 3 | 0.014   | 0.287  |
|            | RNA Polymerase III Transcription Termination                   | 18  | 0.297 | 2 | 0.0347  | 0.454  |
| DNA repair | DNA Repair                                                     | 117 | 1.93  | 7 | 0.00305 | 0.104  |
|            | DNA strand elongation                                          | 31  | 0.511 | 3 | 0.014   | 0.287  |
|            | Processive synthesis on the C-strand of the telomere           | 11  | 0.181 | 2 | 0.0134  | 0.287  |
|            | Removal of the Flap Intermediate from the C-strand             | 10  | 0.165 | 2 | 0.0111  | 0.255  |
|            | Polymerase switching                                           | 14  | 0.231 | 3 | 0.00139 | 0.0608 |
|            | S Phase                                                        | 122 | 2.01  | 6 | 0.0151  | 0.293  |
|            | Nucleotide Excision Repair                                     | 53  | 0.873 | 5 | 0.00169 | 0.0667 |
|            | Lagging Strand Synthesis                                       | 20  | 0.329 | 3 | 0.00404 | 0.132  |
|            | Telomere C-strand (Lagging Strand) Synthesis                   | 22  | 0.362 | 3 | 0.00533 | 0.159  |
|            | Processive synthesis on the lagging strand                     | 15  | 0.247 | 3 | 0.00171 | 0.0667 |
|            | Repair synthesis of patch ~27-30 bases long by DNA polymerase  | 15  | 0.247 | 2 | 0.0246  | 0.396  |
|            | Leading Strand Synthesis                                       | 14  | 0.231 | 3 | 0.00139 | 0.0608 |
|            | Gap-filling DNA repair synthesis and ligation in TC-NER        | 16  | 0.264 | 2 | 0.0278  | 0.423  |

|                                                                              |     |       |   |         |        |
|------------------------------------------------------------------------------|-----|-------|---|---------|--------|
| Polymerase switching on the C-strand of the telomere                         | 14  | 0.231 | 3 | 0.00139 | 0.0608 |
| Repair synthesis for gap-filling by DNA polymerase in TC-NER                 | 15  | 0.247 | 2 | 0.0246  | 0.396  |
| Removal of the Flap Intermediate from the C-strand                           | 10  | 0.165 | 2 | 0.0111  | 0.255  |
| Base Excision Repair                                                         | 19  | 0.313 | 2 | 0.0383  | 0.463  |
| Extension of Telomeres                                                       | 24  | 0.395 | 3 | 0.00684 | 0.175  |
| G1/S-Specific Transcription                                                  | 16  | 0.264 | 2 | 0.0278  | 0.423  |
| Resolution of AP sites via the multiple-nucleotide patch replacement pathway | 17  | 0.28  | 2 | 0.0311  | 0.445  |
| Global Genomic NER (GG-NER)                                                  | 36  | 0.593 | 3 | 0.0209  | 0.355  |
| Resolution of Abasic Sites (AP sites)                                        | 19  | 0.313 | 2 | 0.0383  | 0.463  |
| Chromosome Maintenance                                                       | 124 | 2.04  | 6 | 0.0162  | 0.307  |
| Removal of DNA patch containing abasic residue                               | 17  | 0.28  | 2 | 0.0311  | 0.445  |
| Gap-filling DNA repair synthesis and ligation in GG-NER                      | 16  | 0.264 | 2 | 0.0278  | 0.423  |

**Supplemental table 7. Enriched pathways for downregulated genes at time-point 3 (T3) as compared to at time-point 1 (T1), in patients who were IL8<sub>hi</sub> at T1 and became IL8<sub>lo</sub> at T3.**

| Cluster ID            | List of pathway                                                           | Total | Expected | Hits | P.Value  | FDR   |
|-----------------------|---------------------------------------------------------------------------|-------|----------|------|----------|-------|
| TLR signaling cascade | TRAF3-dependent IRF activation pathway                                    | 14    | 1.69     | 7    | 0.00058  | 0.126 |
|                       | Negative regulators of RIG-I/MDA5 signaling                               | 33    | 3.98     | 10   | 0.00425  | 0.186 |
|                       | TRAF6 mediated NF-kB activation                                           | 16    | 1.93     | 7    | 0.00155  | 0.128 |
|                       | NF-kB activation through FADD/RIP-1 pathway mediated by caspase-8 and -10 | 12    | 1.45     | 6    | 0.00147  | 0.128 |
|                       | RIG-I/MDA5 mediated induction of IFN-alpha/beta pathways                  | 67    | 8.09     | 17   | 0.00199  | 0.139 |
|                       | Cytosolic sensors of pathogen-associated DNA                              | 19    | 2.29     | 7    | 0.00494  | 0.197 |
|                       | RIP-mediated NFkB activation via DAI                                      | 11    | 1.33     | 5    | 0.00626  | 0.204 |
|                       | DAI mediated induction of type I IFNs                                     | 13    | 1.57     | 7    | 0.000323 | 0.126 |
|                       | Toll Like Receptor 3 (TLR3) Cascade                                       | 88    | 10.6     | 20   | 0.00346  | 0.167 |
|                       | Toll Like Receptor 4 (TLR4) Cascade                                       | 103   | 12.4     | 23   | 0.00228  | 0.139 |
|                       | MyD88-independent cascade                                                 | 88    | 10.6     | 20   | 0.00346  | 0.167 |
|                       | TRIF-mediated TLR3/TLR4 signaling                                         | 87    | 10.5     | 20   | 0.003    | 0.156 |
|                       | Activated TLR4 signalling                                                 | 100   | 12.1     | 21   | 0.00734  | 0.219 |
|                       | Toll-Like Receptors Cascades                                              | 123   | 14.8     | 25   | 0.00567  | 0.197 |

|                                                     |                                                                     |     |      |    |         |       |
|-----------------------------------------------------|---------------------------------------------------------------------|-----|------|----|---------|-------|
|                                                     | TRAF6 Mediated Induction of proinflammatory cytokines               | 62  | 7.48 | 13 | 0.0314  | 0.373 |
| Transcription and Post Transcriptional modification | mRNA Processing                                                     | 140 | 16.9 | 30 | 0.00108 | 0.128 |
|                                                     | mRNA Splicing - Major Pathway                                       | 115 | 13.9 | 25 | 0.00222 | 0.139 |
|                                                     | RNA Polymerase II Pre-transcription Events                          | 62  | 7.48 | 13 | 0.0314  | 0.373 |
|                                                     | HIV-1 Transcription Initiation                                      | 41  | 4.95 | 10 | 0.0212  | 0.337 |
|                                                     | RNA Polymerase II Transcription Pre-Initiation And Promoter Opening | 41  | 4.95 | 10 | 0.0212  | 0.337 |
|                                                     | RNA Polymerase II Transcription                                     | 107 | 12.9 | 21 | 0.0158  | 0.33  |
|                                                     | Processing of Capped Intron-Containing Pre-mRNA                     | 119 | 14.4 | 25 | 0.00361 | 0.169 |
|                                                     | mRNA Splicing                                                       | 115 | 13.9 | 25 | 0.00222 | 0.139 |
|                                                     | RNA Polymerase II Transcription Initiation And Promoter Clearance   | 41  | 4.95 | 10 | 0.0212  | 0.337 |
|                                                     | RNA Polymerase II Promoter Escape                                   | 41  | 4.95 | 10 | 0.0212  | 0.337 |
|                                                     | RNA Polymerase II Transcription Initiation                          | 41  | 4.95 | 10 | 0.0212  | 0.337 |
|                                                     | Transcription                                                       | 149 | 18   | 31 | 0.0015  | 0.128 |
|                                                     | RNA Polymerase II HIV-1 Promoter Escape                             | 41  | 4.95 | 10 | 0.0212  | 0.337 |
| mTOR pathway                                        | S6K1-mediated signalling                                            | 9   | 1.09 | 4  | 0.0161  | 0.33  |
|                                                     | Calnexin/calreticulin cycle                                         | 11  | 1.33 | 5  | 0.00626 | 0.204 |

|                       |                                                                              |     |       |     |          |       |
|-----------------------|------------------------------------------------------------------------------|-----|-------|-----|----------|-------|
|                       | ER Quality Control Compartment (ERQC)                                        | 6   | 0.724 | 3   | 0.0265   | 0.357 |
|                       | N-glycan trimming in the ER and Calnexin/Calreticulin cycle                  | 13  | 1.57  | 5   | 0.0142   | 0.33  |
|                       | PKB-mediated events                                                          | 30  | 3.62  | 9   | 0.00708  | 0.216 |
|                       | mTOR signalling                                                              | 29  | 3.5   | 9   | 0.00553  | 0.197 |
|                       | Regulation of Rheb GTPase activity by AMPK                                   | 10  | 1.21  | 4   | 0.0243   | 0.348 |
| Cytokine Signaling    | CD28 co-stimulation                                                          | 30  | 3.62  | 9   | 0.00708  | 0.216 |
|                       | Costimulation by the CD28 family                                             | 68  | 8.21  | 14  | 0.0302   | 0.371 |
|                       | CD28 dependent PI3K/Akt signaling                                            | 19  | 2.29  | 6   | 0.0206   | 0.337 |
|                       | Antigen Activates B Cell Receptor Leading to Generation of Second Messengers | 32  | 3.86  | 11  | 0.000865 | 0.128 |
|                       | Innate Immune System                                                         | 521 | 62.9  | 81  | 0.00822  | 0.226 |
|                       | Fcgamma receptor (FCGR) dependent phagocytosis                               | 86  | 10.4  | 21  | 0.00106  | 0.128 |
|                       | Regulation of actin dynamics for phagocytic cup formation                    | 62  | 7.48  | 13  | 0.0314   | 0.373 |
|                       | Signaling by Interleukins                                                    | 116 | 14    | 22  | 0.02     | 0.337 |
|                       | Cytokine Signaling in Immune system                                          | 286 | 34.5  | 50  | 0.00393  | 0.178 |
| Lymphocyte Activation | Class I MHC mediated antigen processing & presentation                       | 267 | 32.2  | 49  | 0.00154  | 0.128 |
|                       | Antigen processing: Ubiquitination & Proteasome degradation                  | 224 | 27    | 44  | 0.000631 | 0.126 |
|                       | Adaptive Immune System                                                       | 654 | 78.9  | 103 | 0.00194  | 0.139 |

|                       |                                                                     |     |      |    |         |       |
|-----------------------|---------------------------------------------------------------------|-----|------|----|---------|-------|
|                       | Signaling by the B Cell Receptor (BCR)                              | 199 | 24   | 38 | 0.00246 | 0.143 |
| Cell cycle checkpoint | Ubiquitin-dependent degradation of Cyclin D                         | 49  | 5.91 | 11 | 0.0289  | 0.369 |
|                       | p53-Independent G1/S DNA damage checkpoint                          | 52  | 6.28 | 12 | 0.0187  | 0.337 |
|                       | Host Interactions of HIV factors                                    | 141 | 17   | 26 | 0.0172  | 0.337 |
|                       | Vif-mediated degradation of APOBEC3G                                | 55  | 6.64 | 12 | 0.0285  | 0.369 |
|                       | CDK-mediated phosphorylation and removal of Cdc6                    | 49  | 5.91 | 11 | 0.0289  | 0.369 |
|                       | Regulation of mRNA Stability by Proteins that Bind AU-rich Elements | 88  | 10.6 | 21 | 0.00146 | 0.128 |
|                       | Degradation of beta-catenin by the destruction complex              | 65  | 7.85 | 14 | 0.021   | 0.337 |
|                       | Cyclin E associated events during G1/S transition                   | 65  | 7.85 | 14 | 0.021   | 0.337 |
|                       | Autodegradation of Cdh1 by Cdh1:APC/C                               | 68  | 8.21 | 14 | 0.0302  | 0.371 |
|                       | Ubiquitin-dependent degradation of Cyclin D1                        | 49  | 5.91 | 11 | 0.0289  | 0.369 |
|                       | Stabilization of p53                                                | 54  | 6.52 | 12 | 0.0249  | 0.348 |
|                       | Autodegradation of the E3 ubiquitin ligase COP1                     | 53  | 6.4  | 12 | 0.0217  | 0.337 |
|                       | Cross-presentation of soluble exogenous antigens (endosomes)        | 48  | 5.79 | 12 | 0.00992 | 0.263 |
|                       | Activation of NF-kappaB in B Cells                                  | 66  | 7.97 | 14 | 0.0238  | 0.348 |



|  |                                                                     |    |      |    |        |       |
|--|---------------------------------------------------------------------|----|------|----|--------|-------|
|  | Cyclin A:Cdk2-associated events at S phase entry                    | 66 | 7.97 | 14 | 0.0238 | 0.348 |
|  | p53-Independent DNA Damage Response                                 | 52 | 6.28 | 12 | 0.0187 | 0.337 |
|  | Destabilization of mRNA by AUF1 (hnRNP D0)                          | 54 | 6.52 | 12 | 0.0249 | 0.348 |
|  | Regulation of activated PAK-2p34 by proteasome mediated degradation | 48 | 5.79 | 11 | 0.0251 | 0.348 |
|  | Signaling by Wnt                                                    | 65 | 7.85 | 14 | 0.021  | 0.337 |
|  | Ubiquitin Mediated Degradation of Phosphorylated Cdc25A             | 52 | 6.28 | 12 | 0.0187 | 0.337 |

**Supplemental code 1.** Code for Bayesian information criterion analysis

```
> data = read.csv(choose.files(), header = TRUE)
> new_data = data[,-1]
## Stepwise regression using BIC
> library(MASS)
> full.model<- lm(AUC ~ ., data=new_data)
> summary(full.model)
> step.model<- stepAIC(full.model, k = log(nrow(new_data)), direction = "both", trace = FALSE)
  # Use k = 2 for AIC, log(n) for BIC
> step.model$coefficients
> summary(step.model)
> step.model<- stepAIC(full.model, k = 2, direction = "both", trace = FALSE) # Use k = 2 for AIC,
  log(n) for BIC
> step.model$coefficients
> summary(step.model)
## plot for bic
> X = matrix(0, nrow = 37, ncol = 1000)
> AIC_vec = c()
> Rsq_vec = c()
> adj.Rsq_vec = c()
> current.model = full.model
> for(i in 1:1000){
  AIC_vec[i] = extractAIC(current.model, k = log(nrow(new_data)))[2]
  Rsq_vec[i] = summary(current.model)$r.squared
  adj.Rsq_vec[i] = summary(current.model)$adj.r.squared
  X[,i] = (names(full.model$coefficients) %in% names(current.model$coefficients))*1
  new.model<- stepAIC(current.model, k = log(nrow(new_data)), direction = "both", steps = 1,
    trace = FALSE)
  if(all(names(new.model$coefficients)%in% names(current.model$coefficients))
    && all(names(current.model$coefficients)%in% names(new.model$coefficients))){
    break
  } else{
    current.model = new.model
  }
}
```

```

    }
  > conv = length(AIC_vec)
  > X = X[, 1:conv]

## variable plot
  > library(reshape2)
  > library(ggplot2)
  > longData<-melt(X)
  > longData<-longData[longData$value!=0,]
  > longData[,3]= as.factor(longData[,3])
  > p5 <- ggplot(longData, aes(x = Var2, y = Var1)) +
    geom_raster(fill="grey40") +
    labs(x="Iteration", y="Variables", title="Variables selected") +
    theme_bw() +
    scale_y_discrete(limits = names(full.model$coefficients))
  > p5

## bic plot
  > xValue<- 1:conv
  > data <- data.frame(xValue,AIC_vec, Rsq_vec, adj.Rsq_vec)
  > p6 <- ggplot(data, aes(x=xValue)) +
    geom_line(aes(y = AIC_vec, col = "BIC"), lwd = 1.2) +
    geom_point(aes(y = AIC_vec, col = "BIC"), pch = 16, size= 2) +
    theme_bw() +
    labs(x="Iteration", y="BIC", title="Variation of BIC")
  > p6

## R^2 plot
  > p7 <- ggplot(data, aes(x=xValue)) +
    geom_line(aes(y = Rsq_vec, col = "R squared"), lwd = 1.2) +
    geom_point(aes(y = Rsq_vec, col = "R squared"), pch = 16, size= 2) +
    geom_line(aes(y = adj.Rsq_vec, col = "Adjusted R squared"), lwd = 1.2) +
    geom_point(aes(y = adj.Rsq_vec, col = "Adjusted R squared"), pch = 16, size= 2) +
    theme_bw() +
    labs(x="Iteration", y=" ", title="Variation of R squared and adjusted R squared")
  > p7

## panel plot

```

```

> library(ggpubr)
> p8<- ggarrange(p5, ggarrange(p6, p7, ncol = 1), nrow = 1)
> p8 <- annotate_figure(p8, top = text_grob("Stepwise Regression using BIC", face = "bold", size
= 14))
> p8
> ggsave("variable_selection_bic.jpg", p8, width = 12, height = 10, units = "in")

```

**Supplemental code 2.** R codes for receiver operator characteristics analysis. Code shown is for analysis with IL-8 data. Same code was used for other analyses also.

```

> rm(list=ls())
> library(pROC)
> library(randomForest)
> IL8_data <- read.csv(choose.files())
> plot(x=IL8_data$IL.8, y=IL8_data$Death)
> glm.fit = glm(IL8_data$Death ~ IL8_data$IL.8, family = binomial)
> lines(IL8_data$IL.8, glm.fit$fitted.values)
> par(pty = 's')
> roc(IL8_data$Death, glm.fit$fitted.values, plot=TRUE, legacy.axes= TRUE)
> roc.info <- roc(IL8_data$Death, glm.fit$fitted.values, legacy.axes = TRUE)
> roc.df<-      data.frame(tpp=roc.info$sensitivities*100,      fpp=(1-roc.info$sensitivities)*100,
thresholds=roc.info$thresholds)
> library(cutpointr)
> cp <- cutpointr(IL8_data, IL.8, Death, method = maximize_metric, metric = sum_sens_spec)
> summary(cp)
> plot(cp)

```

**Supplemental code 3.** R codes for analyses of single cell RNA sequencing dataset GSE163668 (mild COVID-19 patients).

```

> rm(list=ls())
> library(Seurat)
> library(Matrix)
> library(dplyr)
> data_dir<- 'D:\DC lab\IL8_ANALYSIS\GSE163668 POOLED\GSE163668 POOLED 5,6 MILD'
> expression_matrix<- Read10X(data.dir = data_dir)

```

```

> sample.tmp.seurat<- CreateSeuratObject(counts = expression_matrix, min.cells = 3, min.features
= 200)
> sample.tmp.seurat<- NormalizeData(sample.tmp.seurat)
> sample.tmp.seurat<- FindVariableFeatures(sample.tmp.seurat, selection.method = "vst",
nfeatures = 4000)
> nCoV.integrated<- ScaleData(sample.tmp.seurat)
> nCoV.integrated<- RunPCA(nCoV.integrated, verbose = FALSE,npcs = 100)
> nCoV.integrated<- ProjectDim(object = nCoV.integrated)
> nCoV.integrated<- FindNeighbors(object = nCoV.integrated, dims = 1:50)
> nCoV.integrated<- FindClusters(object = nCoV.integrated, resolution = 1.2)
> nCoV.integrated<- RunTSNE(object = nCoV.integrated, dims = 1:50)
> DimPlot(object = nCoV.integrated, reduction = 'tsne',label = TRUE)
> FeaturePlot(nCoV.integrated,features=c("CXCL8", "CXCR1"), cols=c("Dark Grey", "Red"))

```

**Supplemental code 4.** R codes for analyses of single cell RNA sequencing dataset GSE163668 (severe COVID-19 patients).

```

> rm(list=ls())
> library(Seurat)
> library(Matrix)
> library(dplyr)
> data_dir<- 'D:\DC lab\IL8_ANALYSIS\GSE163668 POOLED\GSE163668 POOLED 1,2,3 SEVERE'
> expression_matrix<- Read10X(data.dir = data_dir)
> sample.tmp.seurat<- CreateSeuratObject(counts = expression_matrix, min.cells = 3, min.features
= 200)
> sample.tmp.seurat<- NormalizeData(sample.tmp.seurat)
> sample.tmp.seurat<- FindVariableFeatures(sample.tmp.seurat, selection.method = "vst",
nfeatures = 4000)
> nCoV.integrated<- ScaleData(sample.tmp.seurat)
> nCoV.integrated<- RunPCA(nCoV.integrated, verbose = FALSE,npcs = 100)
> nCoV.integrated<- ProjectDim(object = nCoV.integrated)
> nCoV.integrated<- FindNeighbors(object = nCoV.integrated, dims = 1:50)
> nCoV.integrated<- FindClusters(object = nCoV.integrated, resolution = 1.2)
> nCoV.integrated<- RunTSNE(object = nCoV.integrated, dims = 1:50)
> DimPlot(object = nCoV.integrated, reduction = 'tsne',label = TRUE)
> FeaturePlot(nCoV.integrated,features=c("CXCL8", "CXCR1"), cols=c("Dark Grey", "Red"))

```

```

>
> CD3_expression = GetAssayData(object = nCoV.integrated)["CD3E",]
> VlnPlot(object = nCoV.integrated, features = c("CD3E"),pt.size = 0)
> CD3_ids = names(which(CD3_expression>1))
> CD3_cells = subset(nCoV.integrated,cells=CD3_ids)
> CD4_expression = GetAssayData(object = nCoV.integrated)["CD4",]
> VlnPlot(object = nCoV.integrated, features = c("CD4"),pt.size = 0)
> CD4_ids2 = names(which(CD4_expression>0.3))
> CD3_CD4_cells = subset(CD3_cells,cells=CD4_ids2)
> FeaturePlot(CD3_CD4_cells,features=c("CXCL8", "CXCR1"), cols=c("Dark Grey", "Red"))
> CD8_expression = GetAssayData(object = nCoV.integrated)["CD8B",]
> VlnPlot(object = nCoV.integrated, features = c("CD4"),pt.size = 0)
> CD8_ids = names(which(CD8_expression>0.5))
> CD3_CD8_cells = subset(CD3_cells,cells=CD8_ids)
> FeaturePlot(CD3_CD8_cells,features=c("CXCL8", "CXCR1"), cols=c("Dark Grey", "Red"))
> CD14_expression = GetAssayData(object = nCoV.integrated)["CD14",]
> VlnPlot(object = nCoV.integrated, features = c("CD14"),pt.size = 0)
> CD14_ids = names(which(CD3_expression>1))
> CD14_ids = names(which(CD14_expression>1))
> CD14_cells = subset(nCoV.integrated,cells=CD14_ids)
> FeaturePlot(CD14_cells,features=c("CXCL8", "CXCR1"), cols=c("Dark Grey", "Red"))
> CD19_expression = GetAssayData(object = nCoV.integrated)["CD19",]
> VlnPlot(object = nCoV.integrated, features = c("CD19"),pt.size = 0)
> CD19_ids = names(which(CD19_expression>0.5))
> CD19_cells = subset(nCoV.integrated,cells=CD19_ids)
> FeaturePlot(CD19_cells,features=c("CXCL8", "CXCR1"), cols=c("Dark Grey", "Red"))
> VlnPlot(object = nCoV.integrated, features = c("NCAM1"),pt.size = 0)
> NCAM1_expression = GetAssayData(object = nCoV.integrated)["NCAM1",]
> NCAM1_ids = names(which(NCAM1_expression>0.5))
> NCAM1_cells = subset(nCoV.integrated,cells=NCAM1_ids)
> FeaturePlot(NCAM1_cells,features=c("CXCL8", "CXCR1"), cols=c("Dark Grey", "Red"))
> VlnPlot(object = nCoV.integrated, features = c("FCGR3A"),pt.size = 0)
> FCGR3A_expression = GetAssayData(object = nCoV.integrated)["FCGR3A",]
> FCGR3A_ids = names(which(FCGR3A_expression>1))

```

```

> FCGR3A_cells = subset(nCoV.integrated,cells=FCGR3A_ids)
> FeaturePlot(FCGR3A_cells,features=c("CXCL8", "CXCR1"), cols=c("Dark Grey", "Red"))
> VlnPlot(object = nCoV.integrated, features = c("ITGAM"),pt.size = 0)
> ITGAM_expression = GetAssayData(object = nCoV.integrated)["ITGAM",]
> ITGAM_ids = names(which(ITGAM_expression>0.5))
> ITGAM_cells = subset(nCoV.integrated,cells=ITGAM_ids)
> FeaturePlot(ITGAM_cells,features=c("CXCL8", "CXCR1"), cols=c("Dark Grey", "Red"))
> ITGAX_expression = GetAssayData(object = nCoV.integrated)["ITGAX",]
> VlnPlot(object = nCoV.integrated, features = c("ITGAX"),pt.size = 0)
> ITGAX_ids = names(which(ITGAX_expression>0.5))
> ITGAX_cells = subset(nCoV.integrated,cells=ITGAX_ids)
> FeaturePlot(ITGAX_cells,features=c("CXCL8", "CXCR1"), cols=c("Dark Grey", "Red"))

```

**Supplemental code 5.** R codes for analyses of single cell RNA sequencing dataset GSE145926 (mild COVID-19 patients).

```

> rm(list=ls())
> library(Seurat)
> library(Matrix)
> library(dplyr)
> expression_matrix1 <- Read10X_h5(choose.files())
> sample.tmp.seurat1 <- CreateSeuratObject(counts = expression_matrix1, min.cells = 3,
min.features = 200)
> expression_matrix2 <- Read10X_h5(choose.files())
> sample.tmp.seurat2 <- CreateSeuratObject(counts = expression_matrix2, min.cells = 3,
min.features = 200)
> sample.tmp.seurat.combined<- merge(sample.tmp.seurat1, y = sample.tmp.seurat2)
> expression_matrix3 <- Read10X_h5(choose.files())
> sample.tmp.seurat3 <- CreateSeuratObject(counts = expression_matrix3, min.cells = 3,
min.features = 200)
> sample.tmp.seurat.combined.mild<- merge(sample.tmp.seurat.combined, y =
sample.tmp.seurat3)
> sample.tmp.seurat.combined.mild<- NormalizeData(sample.tmp.seurat.combined.mild,
verbose = FALSE)

```

```

> sample.tmp.seurat.combined.mild<-
FindVariableFeatures(sample.tmp.seurat.combined.mild, selection.method = "vst", nfeatures =
2000,verbose = FALSE)
> nCoV.integrated<- ScaleData(sample.tmp.seurat.combined.mild, verbose = FALSE)
> nCoV.integrated<- RunPCA(nCoV.integrated, verbose = FALSE,npcs = 100)
> nCoV.integrated.mild<- ProjectDim(object = nCoV.integrated)
> nCoV.integrated<- FindNeighbors(object = nCoV.integrated, dims = 1:50)
> nCoV.integrated<- FindClusters(object = nCoV.integrated, resolution = 0.5)
> nCoV.integrated<- RunTSNE(object = nCoV.integrated, dims = 1:50)
> DimPlot(object = nCoV.integrated, reduction = 'tsne',label = TRUE)
> FeaturePlot(nCoV.integrated,features=c("CXCL8", "CXCR1"), cols=c("light Grey", "Red"))

```

**Supplemental code 6.** R codes for analyses of single cell RNA sequencing dataset GSE145926 (severe COVID-19 patients).

```

> rm(list=ls())
> library(Seurat)
> library(Matrix)
> library(dplyr)
> expression_matrix1 <- Read10X_h5(choose.files())
> sample.tmp.seurat1 <- CreateSeuratObject(counts = expression_matrix1, min.cells = 3,
min.features = 200)
> expression_matrix2 <- Read10X_h5(choose.files())
> sample.tmp.seurat2 <- CreateSeuratObject(counts = expression_matrix2, min.cells = 3,
min.features = 200)
> sample.tmp.seurat.combined<- merge(sample.tmp.seurat1, y = sample.tmp.seurat2)
> expression_matrix3 <- Read10X_h5(choose.files())
> sample.tmp.seurat3 <- CreateSeuratObject(counts = expression_matrix3, min.cells = 3,
min.features = 200)
> sample.tmp.seurat.combined2<- merge(sample.tmp.seurat.combined, y = sample.tmp.seurat3)
> expression_matrix4 <- Read10X_h5(choose.files())
> sample.tmp.seurat4 <- CreateSeuratObject(counts = expression_matrix4, min.cells = 3,
min.features = 200)
> sample.tmp.seurat.combined3<- merge(sample.tmp.seurat.combined2, y = sample.tmp.seurat4)
> expression_matrix5 <- Read10X_h5(choose.files())

```



```

> sample.tmp.seurat5 <- CreateSeuratObject(counts = expression_matrix5, min.cells = 3,
min.features = 200)
> sample.tmp.seurat.combined4<- merge(sample.tmp.seurat.combined3, y = sample.tmp.seurat5)
> expression_matrix6 <- Read10X_h5(choose.files())
> sample.tmp.seurat6 <- CreateSeuratObject(counts = expression_matrix6, min.cells = 3,
min.features = 200)
> sample.tmp.seurat.combined5<- merge(sample.tmp.seurat.combined4, y = sample.tmp.seurat6)
> sample.tmp.seurat.combined5<- NormalizeData(sample.tmp.seurat.combined5, verbose = FALSE)
> sample.tmp.seurat.combined5<- FindVariableFeatures(sample.tmp.seurat.combined5,
selection.method = "vst", nfeatures = 2000,verbose = FALSE)
> nCoV.integrated.severe<- ScaleData(sample.tmp.seurat.combined5, verbose = FALSE)
> nCoV.integrated.severe<- RunPCA(nCoV.integrated.severe, verbose = FALSE,npcs = 100)
> nCoV.integrated.severe.final<- ProjectDim(object = nCoV.integrated.severe)
> nCoV.integrated.severe<- FindNeighbors(object = nCoV.integrated.severe, dims = 1:50)
> nCoV.integrated.severe<- FindClusters(object = nCoV.integrated.severe, resolution = 0.5)
> nCoV.integrated.severe<- RunTSNE(object = nCoV.integrated.severe, dims = 1:50)
> DimPlot(object = nCoV.integrated.severe, reduction = 'tsne',label = TRUE)
> FeaturePlot(nCoV.integrated.severe,features=c("CXCL8", "CXCR1"), cols=c("light Grey", "Red"))
> FeaturePlot(nCoV.integrated.severe,"EPCAM", cols=c("Dark Grey", "Blue"))
> FeaturePlot(nCoV.integrated.severe,"CXCL8", cols=c("Dark Grey", "Blue"))
> FeaturePlot(nCoV.integrated.severe,"CD4", cols=c("Dark Grey", "Blue"))
> FeaturePlot(nCoV.integrated.severe,"CD8B", cols=c("Dark Grey", "Blue"))
> FeaturePlot(nCoV.integrated.severe,"CD19", cols=c("Dark Grey", "Blue"))
> FeaturePlot(nCoV.integrated.severe,"NCAM1", cols=c("Dark Grey", "Blue"))
> FeaturePlot(nCoV.integrated.severe,"CD14", cols=c("Dark Grey", "Blue"))
> FeaturePlot(nCoV.integrated.severe,"FCGR3A", cols=c("Dark Grey", "Blue"))
> FeaturePlot(nCoV.integrated.severe,"ITGAM", cols=c("Dark Grey", "Blue"))
> FeaturePlot(nCoV.integrated.severe,"ITGAX", cols=c("Dark Grey", "Blue"))
> EPCAM_expression = GetAssayData(object = nCoV.integrated.severe)["EPCAM",]
> CD4_expression = GetAssayData(object = nCoV.integrated.severe)["CD4",]
> CD8B_expression = GetAssayData(object = nCoV.integrated.severe)["CD8B",]
> CD19_expression = GetAssayData(object = nCoV.integrated.severe)["CD19",]
> NCAM1_expression = GetAssayData(object = nCoV.integrated.severe)["NCAM1",]
> CD14_expression = GetAssayData(object = nCoV.integrated.severe)["CD14",]

```

```

> FCGR3A_expression = GetAssayData(object = nCoV.integrated.severe)["FCGR3A",]
> ITGAM_expression = GetAssayData(object = nCoV.integrated.severe)["ITGAM",]
> ITGAX_expression = GetAssayData(object = nCoV.integrated.severe)["ITGAX",]
> CD3_expression = GetAssayData(object = nCoV.integrated.severe)["CD3E",]
> CD3_ids = names(which(CD3_expression>0.5))
> CD3_cells = subset(nCoV.integrated.severe,cells=CD3_ids)
> FeaturePlot(CD3_cells,"CXCL8")
> CD4_expression = GetAssayData(object = nCoV.integrated.severe)["CD4",]
> VlnPlot(object = nCoV.integrated.severe, features = c("CD4"),pt.size = 0)
> CD4_ids = names(which(CD4_expression>0.2))
> CD4_cells = subset(nCoV.integrated.severe,cells=CD4_ids)
> CD4_cells = subset(CD3_cells,cells=CD4_ids)
> FeaturePlot(CD4_cells,"CXCL8",cols=c("Dark Grey", "Red"))
> FeaturePlot(CD4_cells,"CXCR1",cols=c("Dark Grey", "Red"))
> CD8_ids = names(which(CD8B_expression>0.5))
> CD8_cells = subset(CD3_cells,cells=CD8_ids)
> FeaturePlot(CD8_cells,"CXCL8",cols=c("Dark Grey", "Red"))
> FeaturePlot(CD8_cells,"CXCR1",cols=c("Dark Grey", "Red"))
> CD19_ids = names(which(CD19_expression>0.2))
> CD19_cells = subset(nCoV.integrated.severe,cells=CD19_ids)
> FeaturePlot(CD19_cells,"CXCL8",cols=c("Dark Grey", "Red"))
> FeaturePlot(CD19_cells,"CXCR1",cols=c("Dark Grey", "Red"))
> VlnPlot(object = nCoV.integrated.severe, features = c("NCAM1"),pt.size = 0)
> NCAM1_ids = names(which(NCAM1_expression>0.5))
> NCAM1_cells = subset(nCoV.integrated.severe,cells=NCAM1_ids)
> FeaturePlot(NCAM1_cells,"CXCL8",cols=c("Dark Grey", "Red"))
> FeaturePlot(NCAM1_cells,"CXCR1",cols=c("Dark Grey", "Red"))
> VlnPlot(object = nCoV.integrated.severe, features = c("CD14"),pt.size = 0)
> CD14_ids = names(which(CD14_expression>0.3))
> CD14_cells = subset(nCoV.integrated.severe,cells=CD14_ids)
> FeaturePlot(CD14_cells,"CXCL8", cols=c("Dark Grey", "Red"))
> FeaturePlot(CD14_cells,"CXCR1", cols=c("Dark Grey", "Red"))
> VlnPlot(object = nCoV.integrated.severe, features = c("FCGR3A"),pt.size = 0)
> FCGR3A_ids = names(which(FCGR3A_expression>0.3))

```

```

> FCGR3A_cells = subset(nCoV.integrated.severe,cells=FCGR3A_ids)
> FeaturePlot(FCGR3A_cells,"CXCL8", cols=c("Dark Grey", "Red"))
> FeaturePlot(FCGR3A_cells,"CXCR1", cols=c("Dark Grey", "Red"))
> VlnPlot(object = nCoV.integrated.severe, features = c("ITGAM"),pt.size = 0)
> ITGAM_ids = names(which(ITGAM_expression>0.2))
> ITGAM_cells = subset(nCoV.integrated.severe,cells=ITGAM_ids)
> FeaturePlot(ITGAM_cells,"CXCL8", cols=c("Dark Grey", "Red"))
> FeaturePlot(ITGAM_cells,"CXCR1", cols=c("Dark Grey", "Red"))
> VlnPlot(object = nCoV.integrated.severe, features = c("ITGAX"),pt.size = 0)
> ITGAX_ids = names(which(ITGAX_expression>0.3))
> ITGAX_cells = subset(nCoV.integrated.severe,cells=ITGAX_ids)
> FeaturePlot(ITGAX_cells,"CXCL8", cols=c("Dark Grey", "Red"))
> FeaturePlot(ITGAX_cells,"CXCR1", cols=c("Dark Grey", "Red"))

```
